# Supplementary material
Source: bioRxiv or medRxiv preprint supplement (https://www.biorxiv.org/highwire/filestream/119530/field_highwire_adjunct_files/0/394387-1.pdf)
Supplement: Supplementary file [file 394387-1.pdf]

## Supplementary Figures

**Supplementary Figure 1: An overview of our study design.**

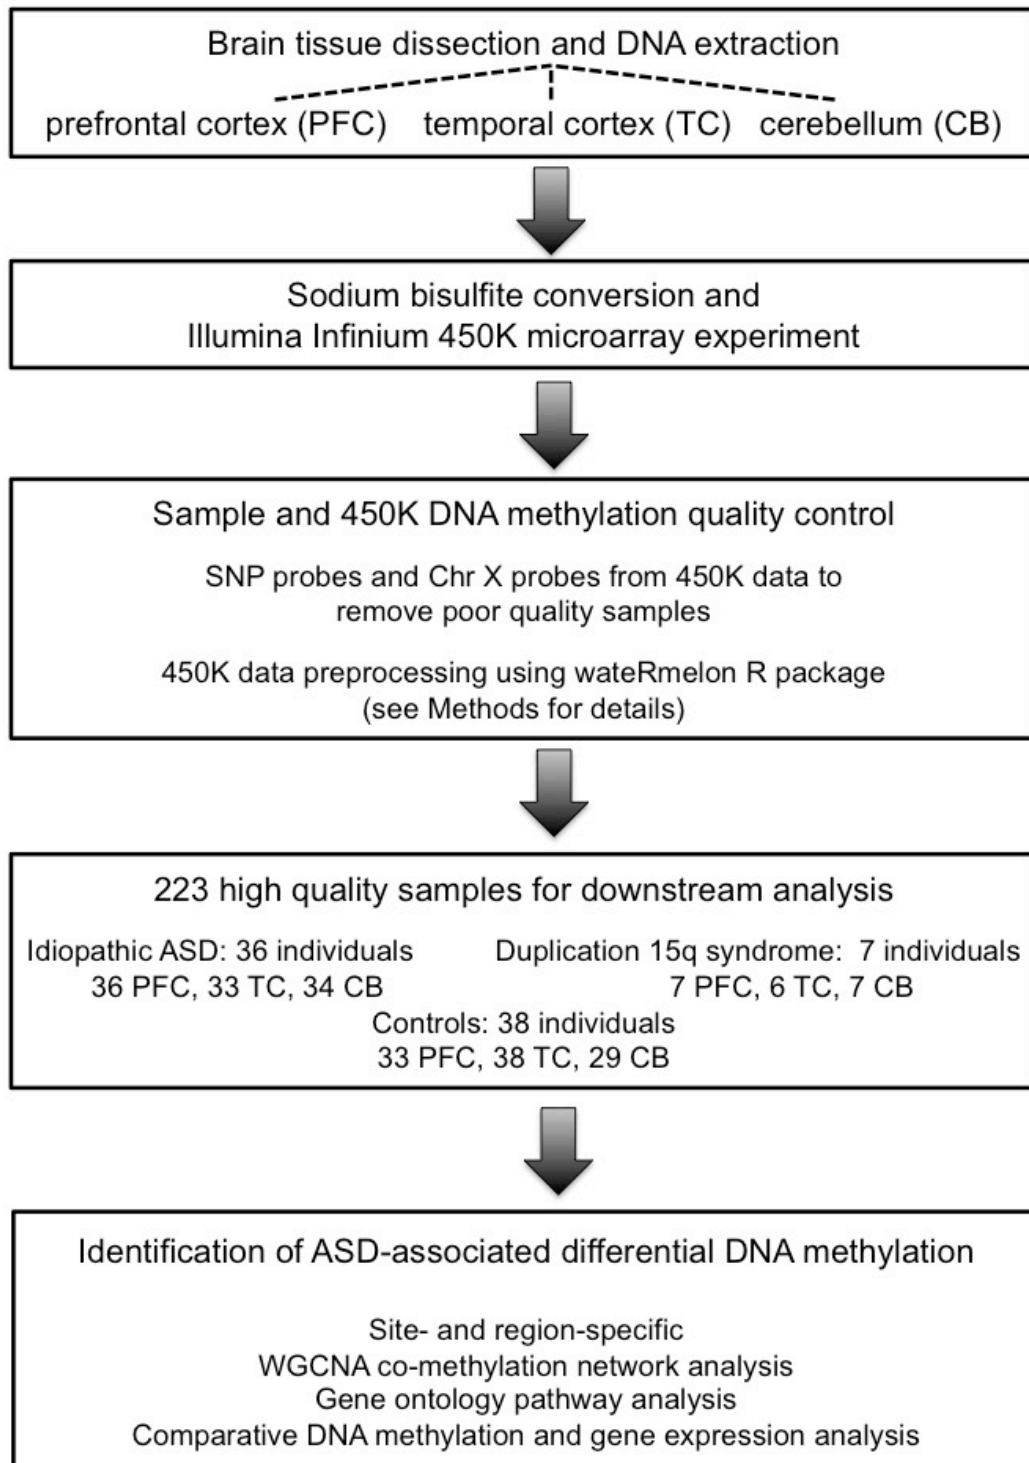

**Supplementary Figure 2: There is a strong positive correlation between the estimated 'DNA methylation age' - derived using an epigenetic clock based on DNA methylation values<sup>1,2</sup> - and recorded chronological age for each donor across all three brain regions. Shown are data for a) FC ( $r=0.98$ ,  $P = 1.40e-52$ ), b) TC ( $r=0.97$ ,  $P = 5.69e-46$ ), and c) CB ( $r=0.94$ ,  $P = 9.43e-33$ ). CTL = control samples, iASD = idiopathic autism cases, dup15q = 15q duplication carriers.**

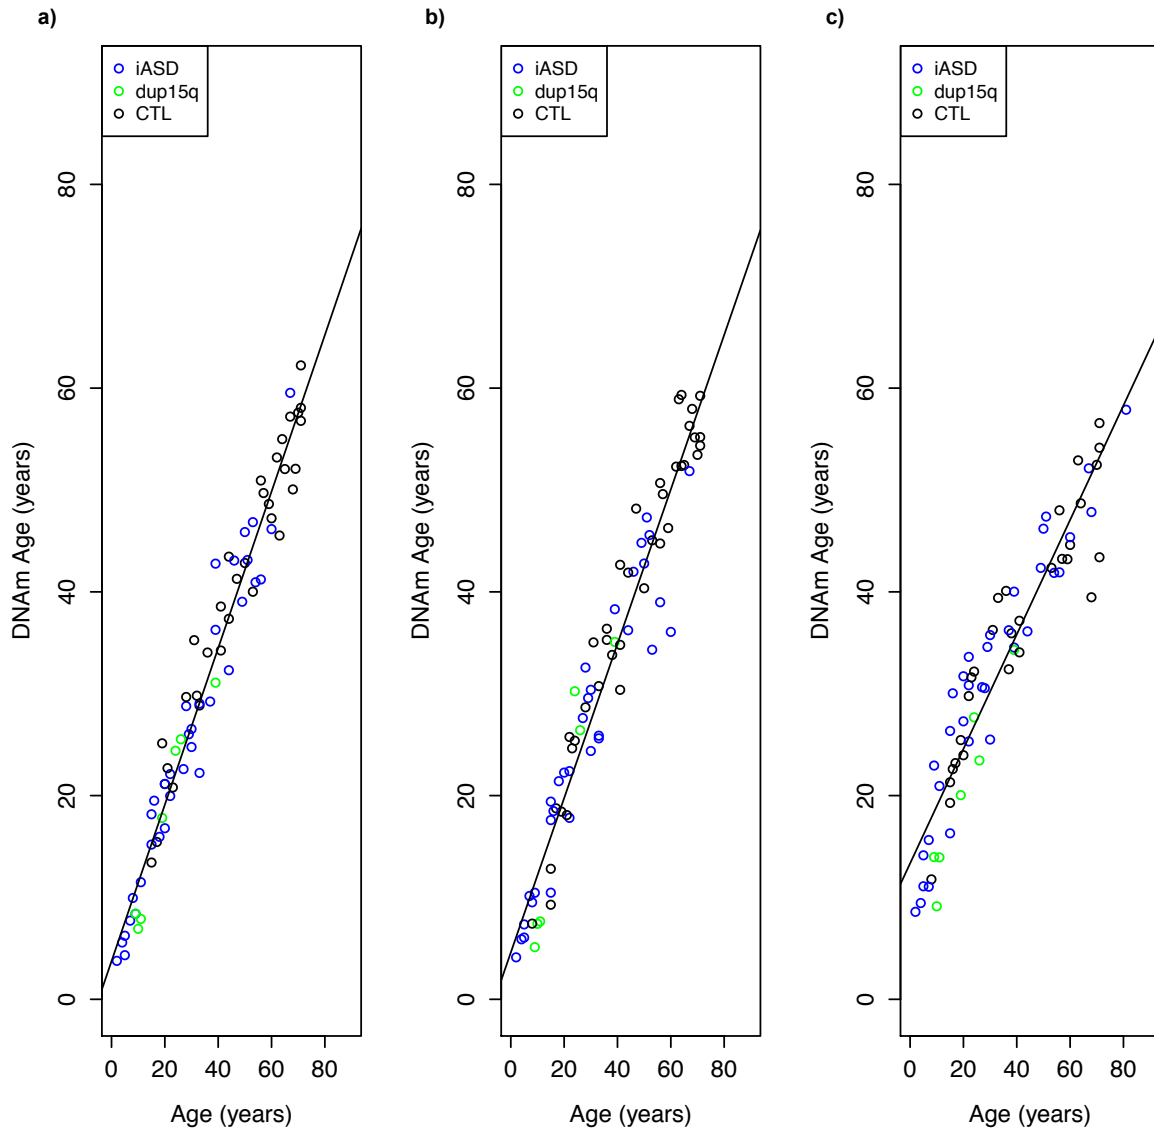

**Supplementary Figure 3: Hierarchical-clustering of the thousand most variable DNA methylation sites across all profiled brain samples.** Cerebellum samples are clearly distinct from the two cortical regions (prefrontal cortex (PFC) and temporal cortex (TC)). Cerebellum = purple, frontal cortex = blue, temporal cortex = green.

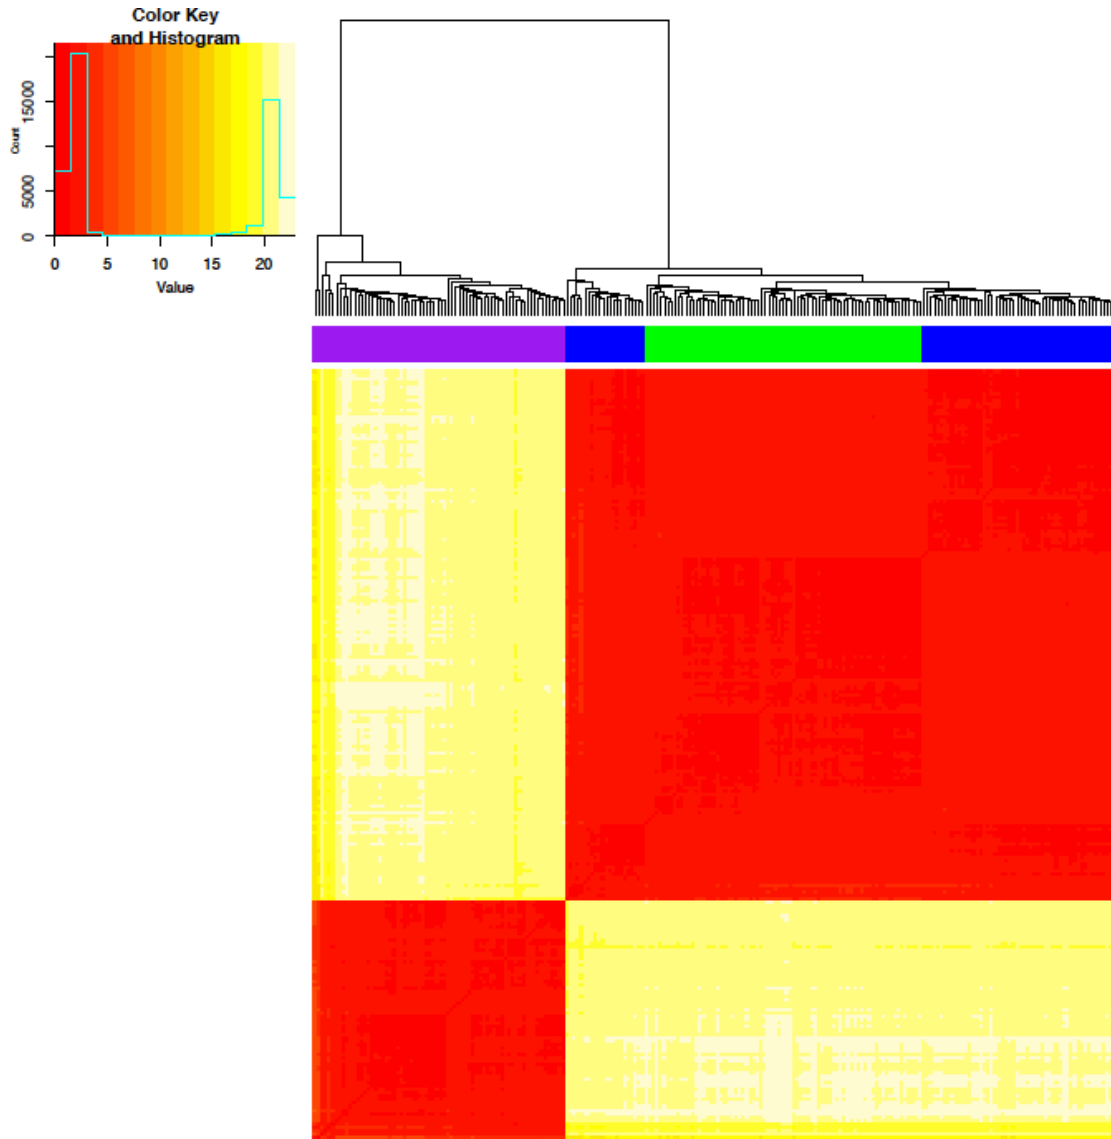

FC-Blue, TC-Green, Cerebellum-Purple

**Supplementary Figure 4: Effect sizes at iASD-associated DMPs are highly correlated between the two cortical regions (prefrontal cortex (PFC) and temporal cortex (TC) but not between cortex and cerebellum. Shown are comparisons between tissues for a) the top 100 FC DMPs (FC vs TC:  $r = 0.77$ ,  $P = 3.06e-21$ ; FC vs CB:  $r = -0.14$ ,  $P = 0.18$ ), b) the top 100 TC DMPs (TC vs FC:  $r = 0.81$ ,  $P = 2.48e-24$ ;  $r = 0.17$ ,  $P = 0.09$ ), and c) the top 100 CB DMPs (CB vs FC:  $r = 0.005$ ,  $P = 0.96$ ; CB vs TC:  $r = -0.03$ ,  $P = 0.77$ ).**

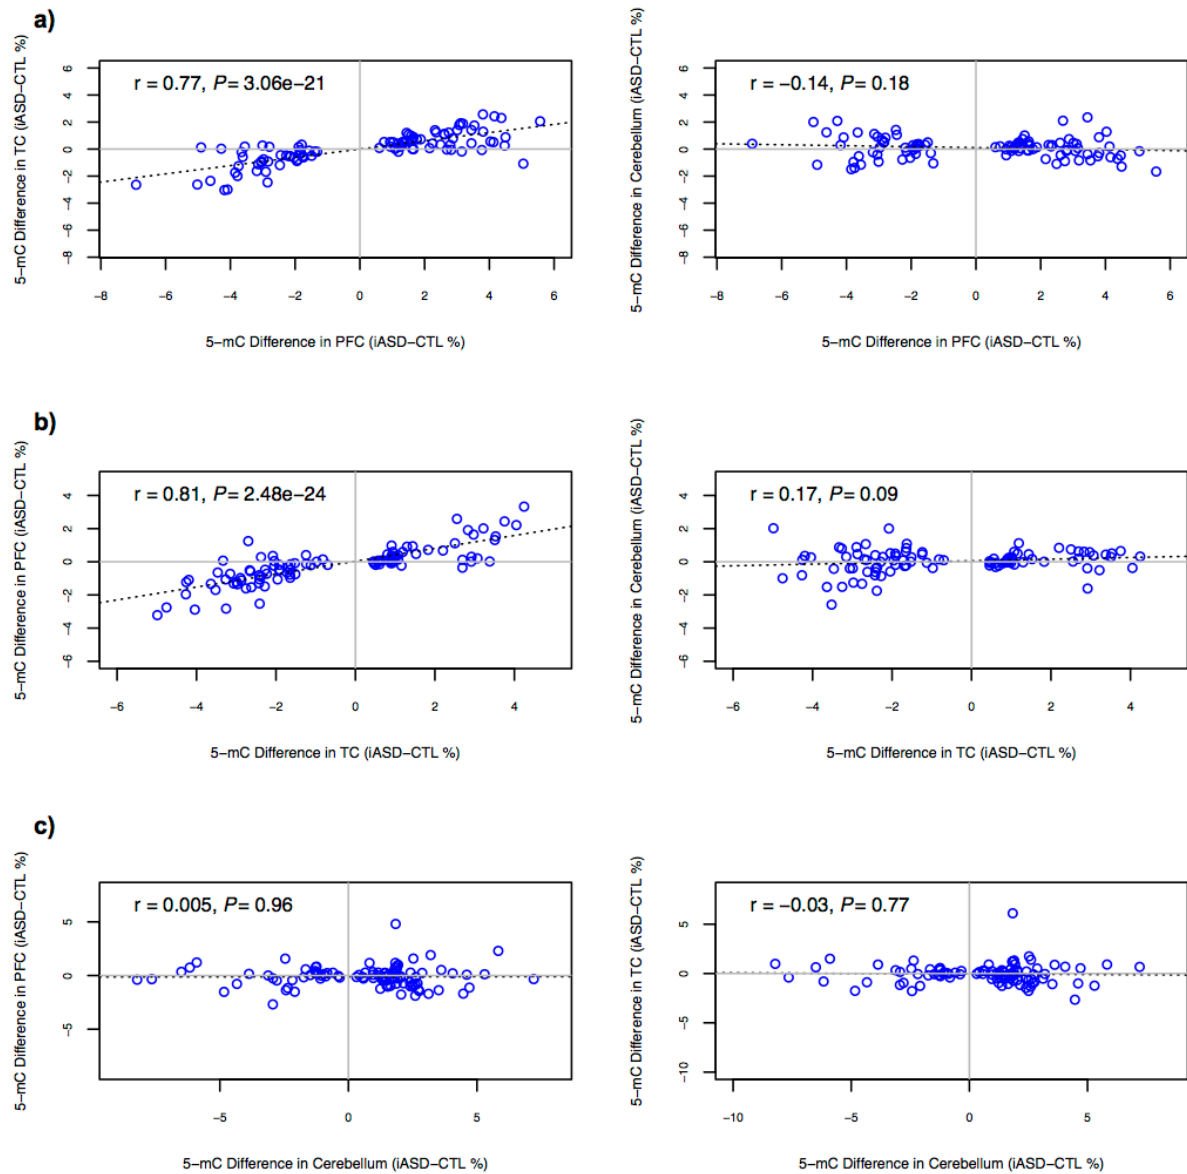

**Supplementary Figure 5: Manhattan plot showing P-values from a multi-level model used to identify consistent iASD-associated differences across both cortical regions (FC and TC). We identified 157 DMPs ( $P < 5 \times 10^{-5}$ ) with the top-ranked cross-cortex iASD-associated difference (cg14392966,  $P = 1.77 \times 10^{-8}$ ) being located immediately upstream of *PUS3* and *DDX25* on chromosome 11q24.2. \* =  $P < 5 \times 10^{-5}$ .**

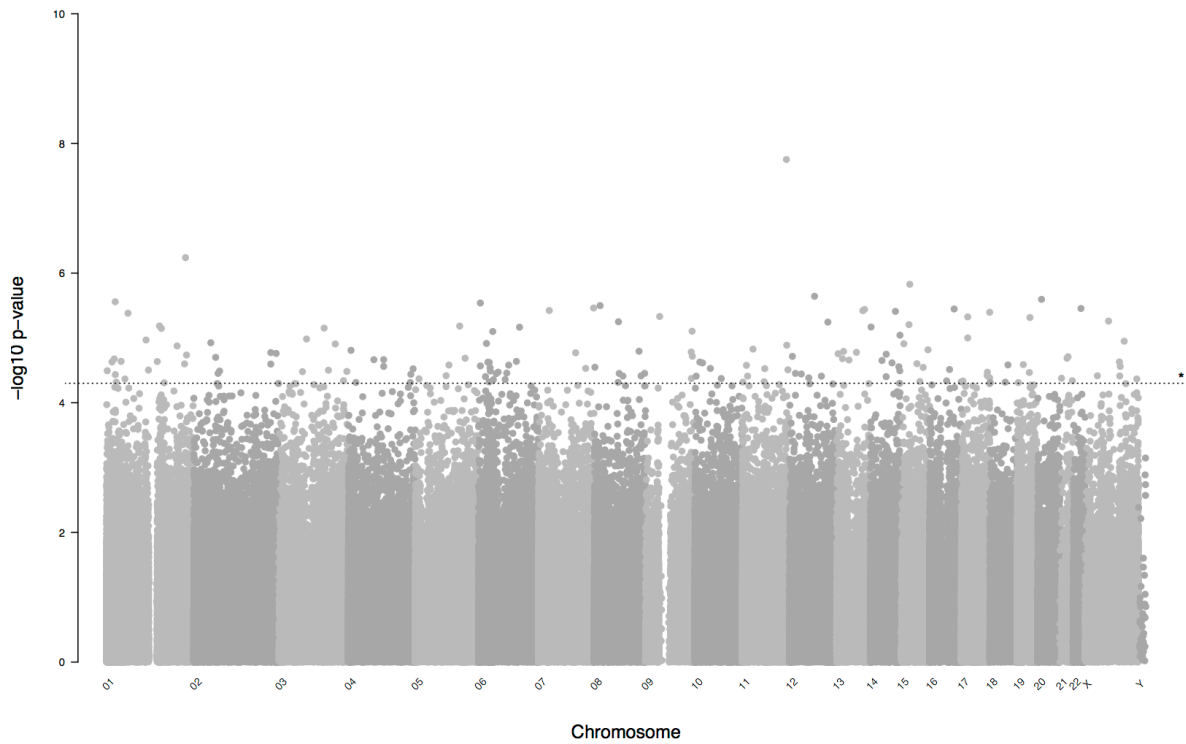

**Supplementary Figure 6. Dup15q-associated prefrontal cortex (PFC) DMPs are focused in a discrete differentially methylated domain within the duplicated region.** Shown is the distribution of P-values across the dup15q region from our dup15q vs. control analysis. Differentially methylated positions are stratified by direction of effect (red = hypermethylated in dup15q ASD, green = hypomethylated in dup15q ASD). Shown at the top are the estimated break-points for individual dup15q samples derived from DNA methylation data for each individual donor. The dup15q differentially methylated domain includes clusters of probes that are both hyper- and hypo-methylated overlapping a known imprinted gene cluster containing paternally-expressed (green), maternally-expressed (red) and biallelically-expressed (blue) genes.

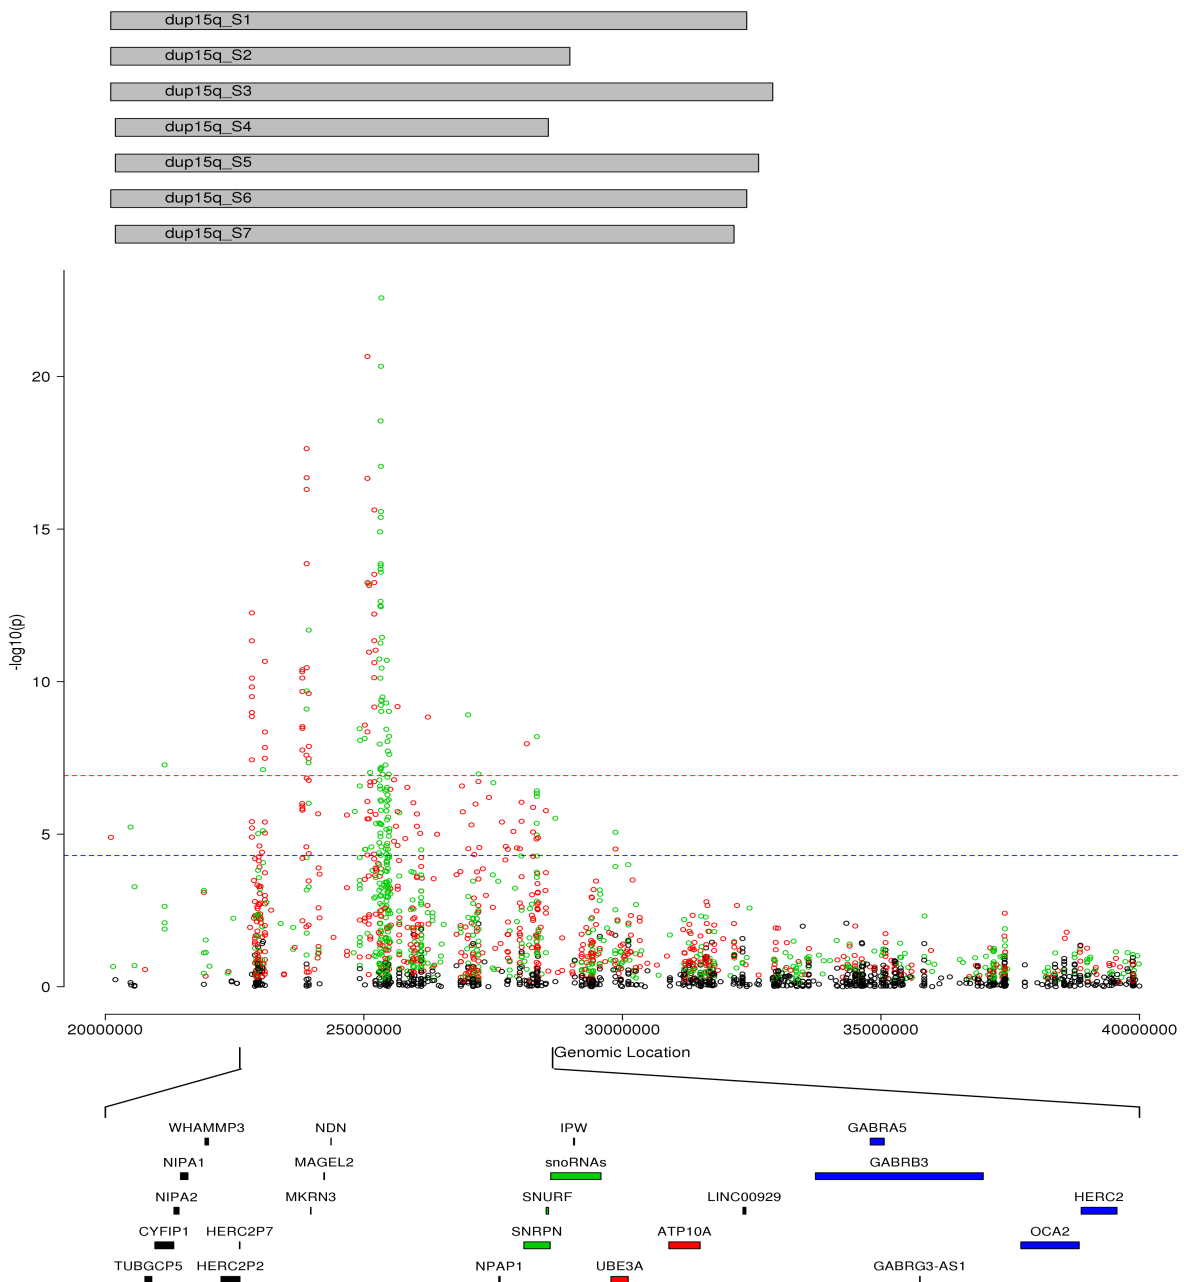

**Supplementary Figure 7. Dup15q-associated temporal cortex (TC) DMPs are focused in a discrete differentially methylated domain within the duplicated region.** Shown is the distribution of P-values across the dup15q region from our dup15q vs. control analysis. Differentially methylated positions are stratified by direction of effect (red = hypermethylated in dup15q ASD, green = hypomethylated in dup15q ASD). Shown at the top are the estimated break-points for individual dup15q samples derived from DNA methylation data. The dup15q differentially methylated domain includes clusters of probes that are both hyper- and hypo-methylated overlapping a known imprinted gene cluster containing paternally-expressed (green), maternally-expressed (red) and biallelically-expressed (blue) genes.

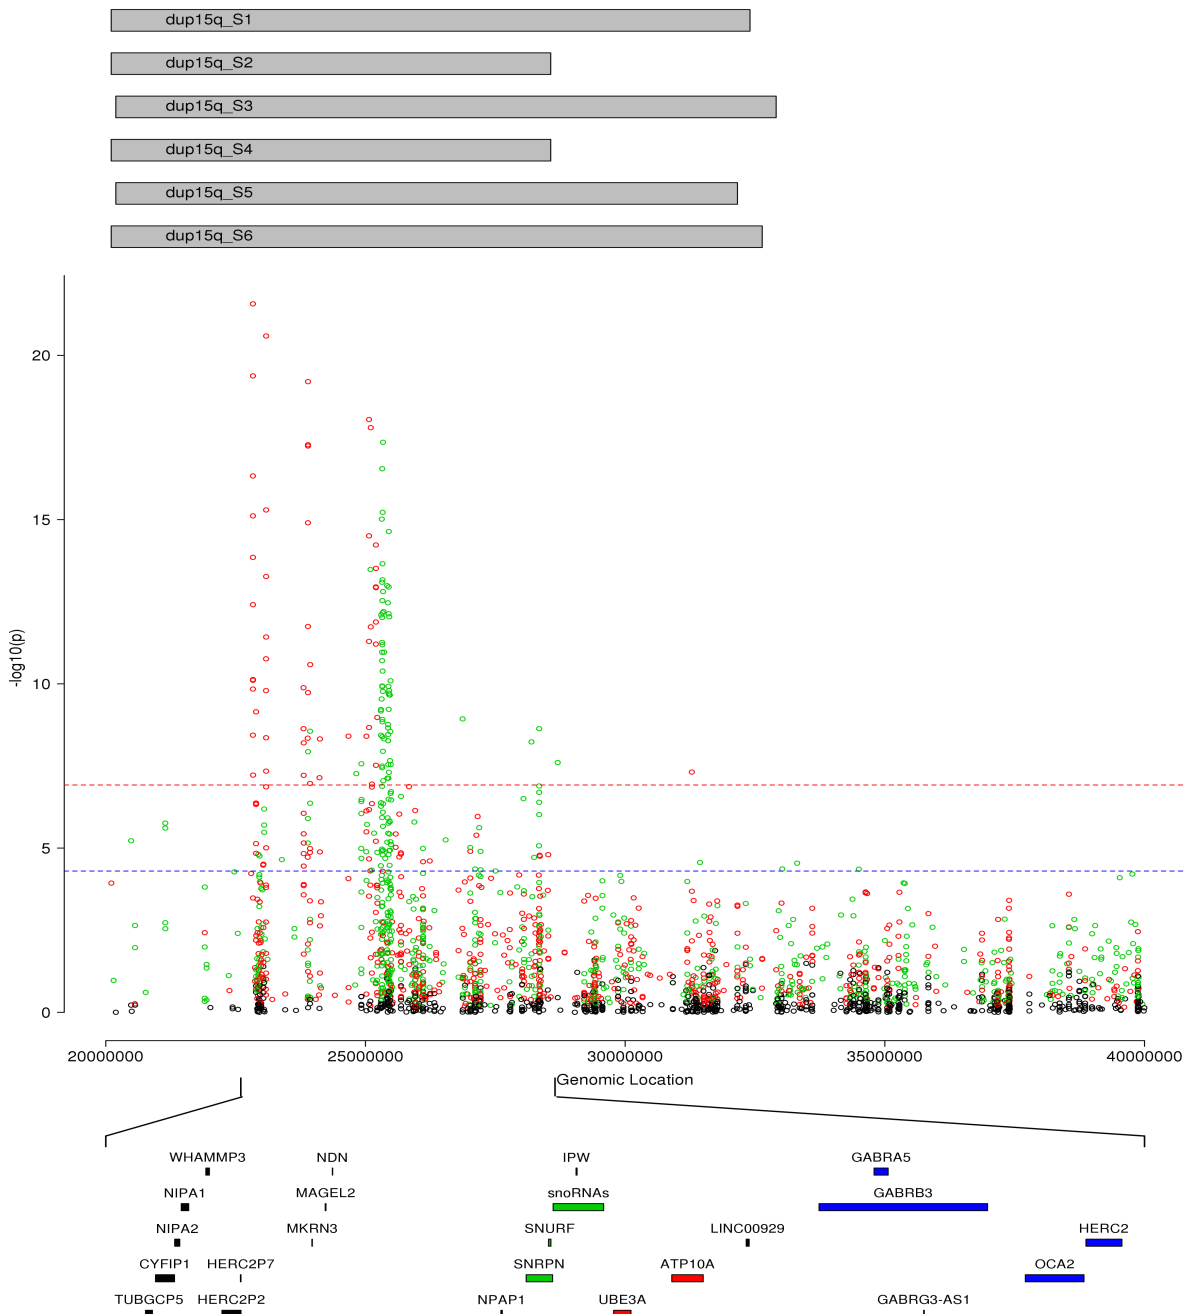



**Supplementary Figure 8. Dup15q-associated cerebellum DMPs are focused in a discrete differentially methylated domain within the duplicated region.** Shown is the distribution of P-values across the dup15q region from our dup15q vs. control analysis. Differentially methylated positions are stratified by direction of effect (red = hypermethylated in dup15q ASD, green = hypomethylated in dup15q ASD). Shown at the top are the estimated break-points for individual dup15q samples derived from DNA methylation data. The dup15q differentially methylated domain includes clusters of probes that are both hyper- and hypo-methylated overlapping a known imprinted gene cluster containing paternally-expressed (green), maternally-expressed (red) and biallelically-expressed (blue) genes.

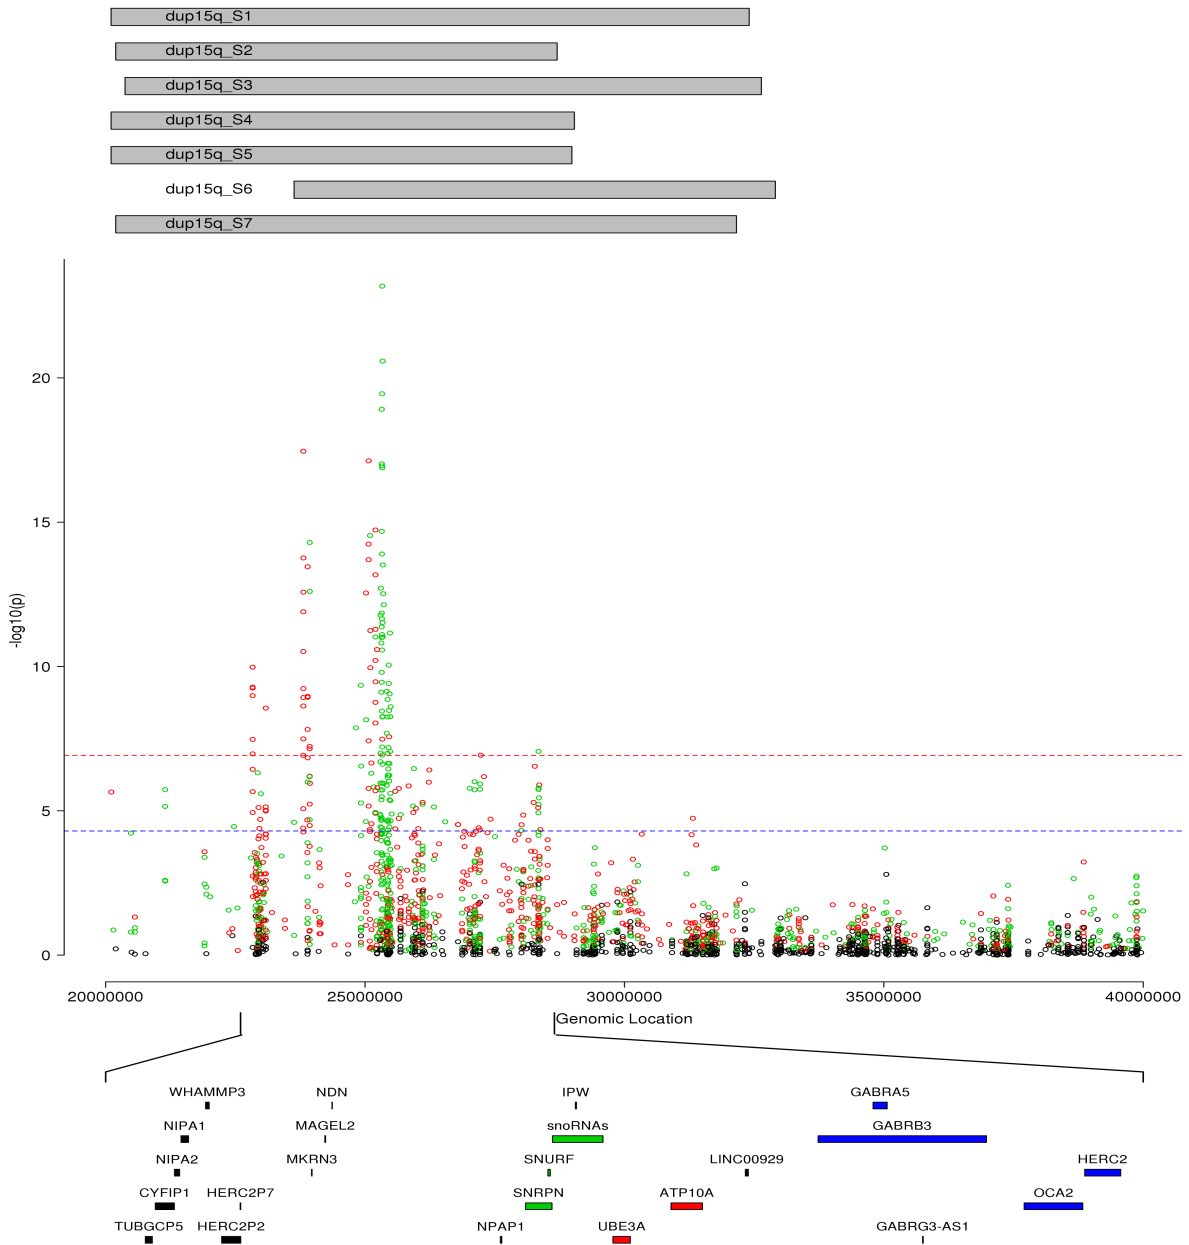

**Supplementary Figure 9: Manhattan plot of P-values from an analysis of differential prefrontal cortex (PFC) DNA methylation in dup15q carriers. A list of significant dup15q-associated DMPs (\*\*P < 1.198 x 10<sup>-7</sup>) are listed in Supplementary Table 7.**

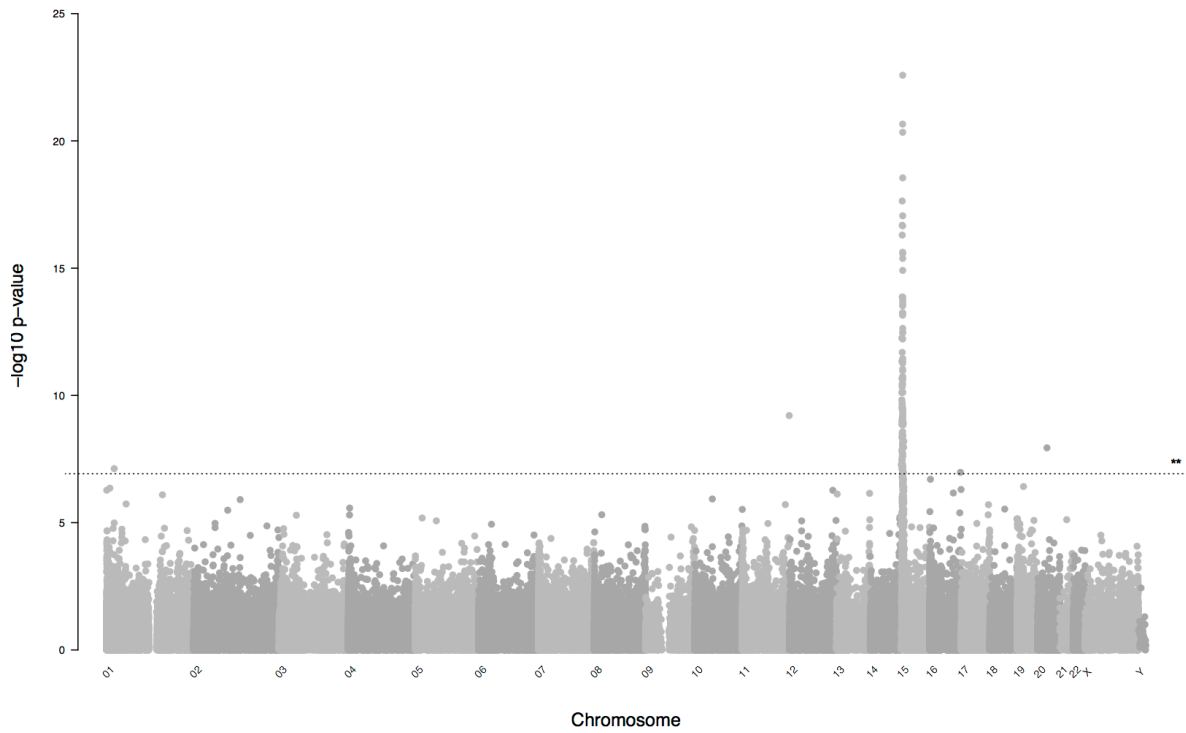

**Supplementary Figure 10: Manhattan plot of P-values from an analysis of differential temporal cortex DNA methylation in dup15q carriers. A list of significant dup15q-associated DMPs (\*\*P < 1.198 x 10<sup>-7</sup>) are listed in Supplementary Table 8.**

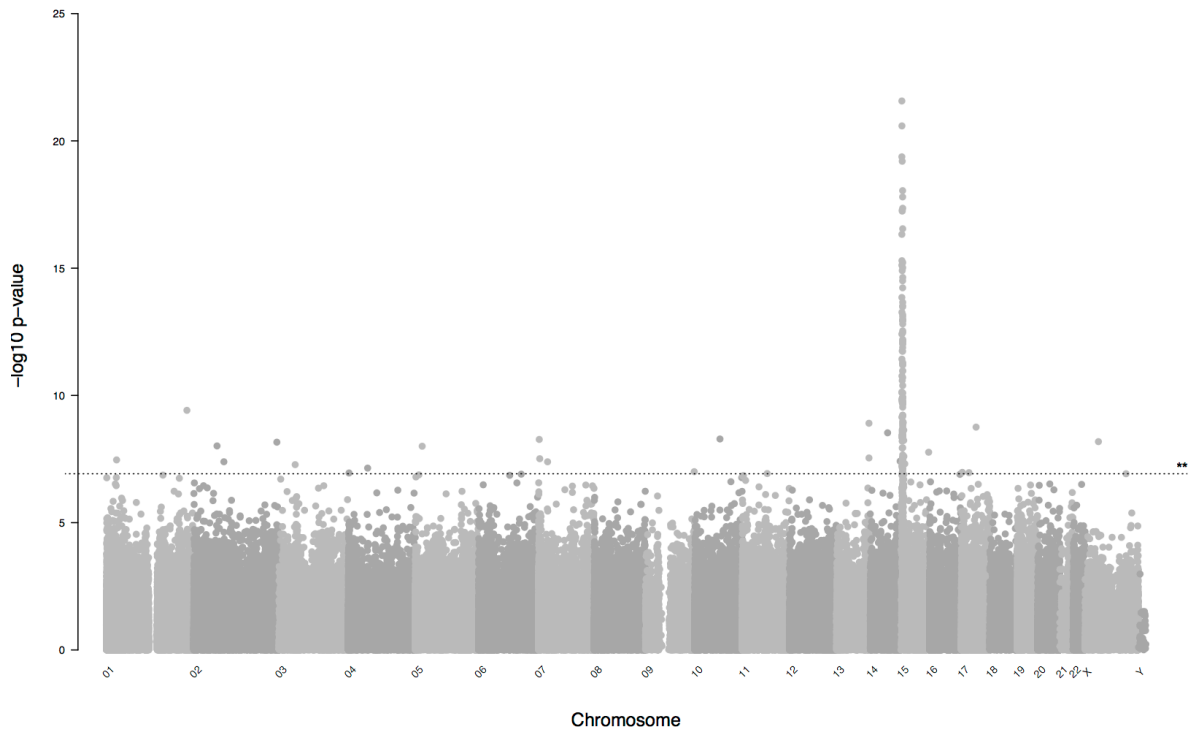

**Supplementary Figure 11: Manhattan plot of P-values from an analysis of differential cerebellum DNA methylation in dup15q carriers.** A list of significant dup15q-associated DMPs (\*\*P < 1.198 x 10<sup>-7</sup>) are listed in **Supplementary Table 9**.

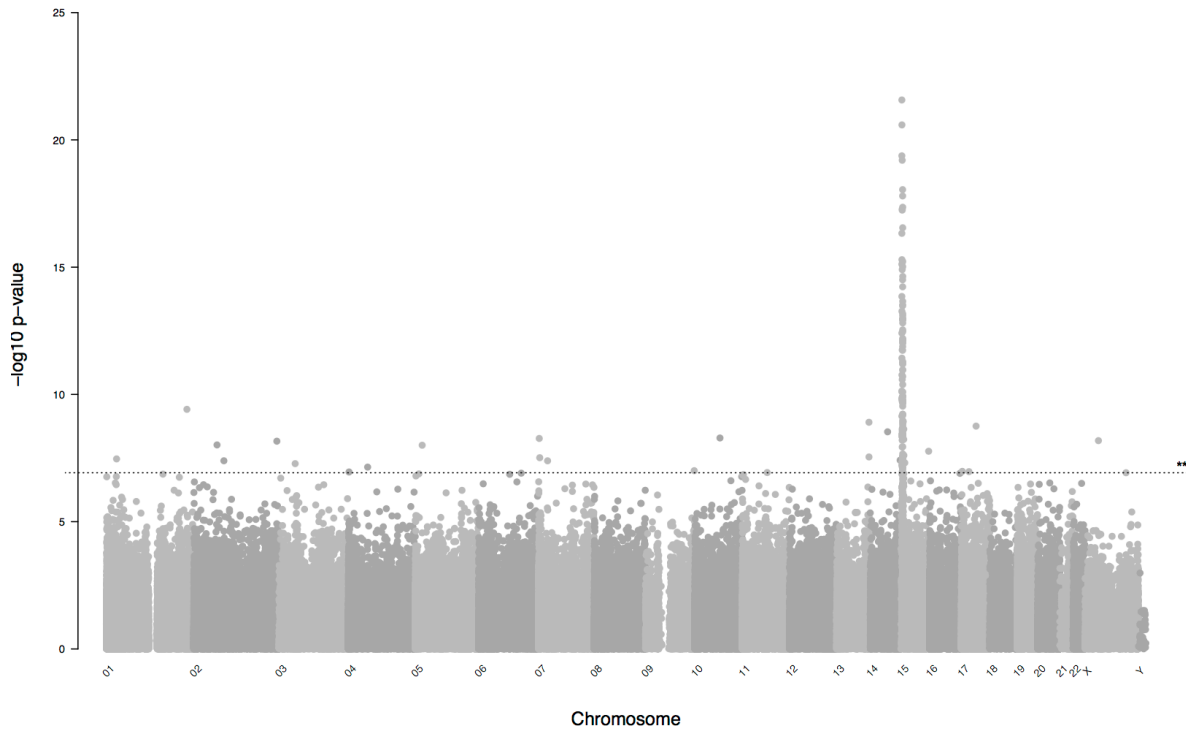

**Supplementary Figure 12: Although effect sizes at dup15q DMPs are highly consistent across each of the three brain regions, the overall pattern of dup15q-associated variation especially DMPs outside of dup15q regions are more similar between the two cortical regions (prefrontal cortex (PFC) and temporal cortex (TC)) than between cortex and cerebellum (CB). Shown are comparison between tissues for **A**) PFC DMPs with  $p < 5e-05$  (PFC vs TC: across all probes  $r = 0.96$ ,  $P = 9.73e-201$ , probes outside of dup15q regions  $r = 0.93$ ,  $P = 1.13e-58$ ; PFC vs CB: across all probes  $r = 0.87$ ,  $P = 9.26e-110$ , probes outside of dup15q regions  $r = 0.66$ ,  $P = 4.95e-58$ ), **B**) TC DMPs with  $p < 5e-05$  (TC vs PFC: across all probes  $r = 0.79$ ,  $P = <2.2e-16$ , probes outside of dup15q regions  $r = 0.73$ ,  $P = 1.25e-221$ ; TC vs CB: across all probes  $r = 0.64$ ,  $P = 4.81e-177$ , probes outside of dup15q regions  $r = 0.44$ ,  $P = 1.24e-62$ ), and **C**) cerebellum DMPs with  $p < 5e-05$  (CB vs PFC: across all probes  $r = 0.87$ ,  $P = 5.44e-99$ , probes outside of dup15q regions  $r = 0.50$ ,  $P = 7.40e-08$ ; CB vs TC: across all probes  $r = 0.85$ ,  $P = 1.81e-88$ , probes outside of dup15q regions  $r = 0.47$ ,  $P = 4.02e-07$ ).**

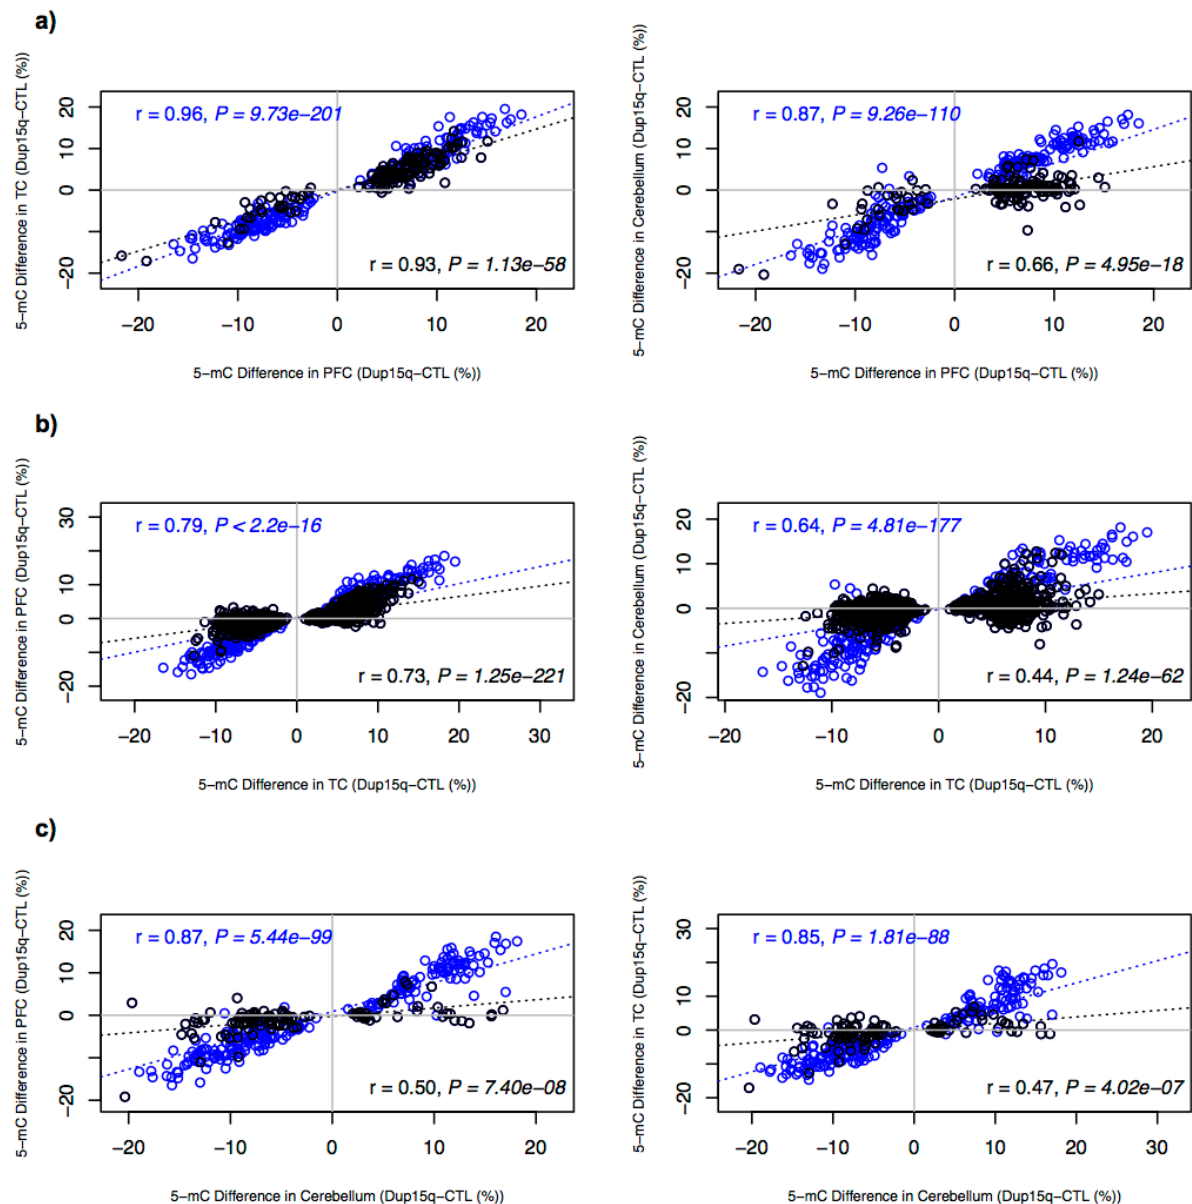

**Supplementary Figure 13: Hierarchical clustering of samples based on DNA methylation at iASD-associated DMPs in the prefrontal cortex (PFC).** Shown is the clustering of samples based on DNA methylation levels (red = low, yellow = high) at iASD-associated DMPs ( $P < 5e-05$ ). iASD and dup15q samples are predominantly clustered together, separately to control samples.

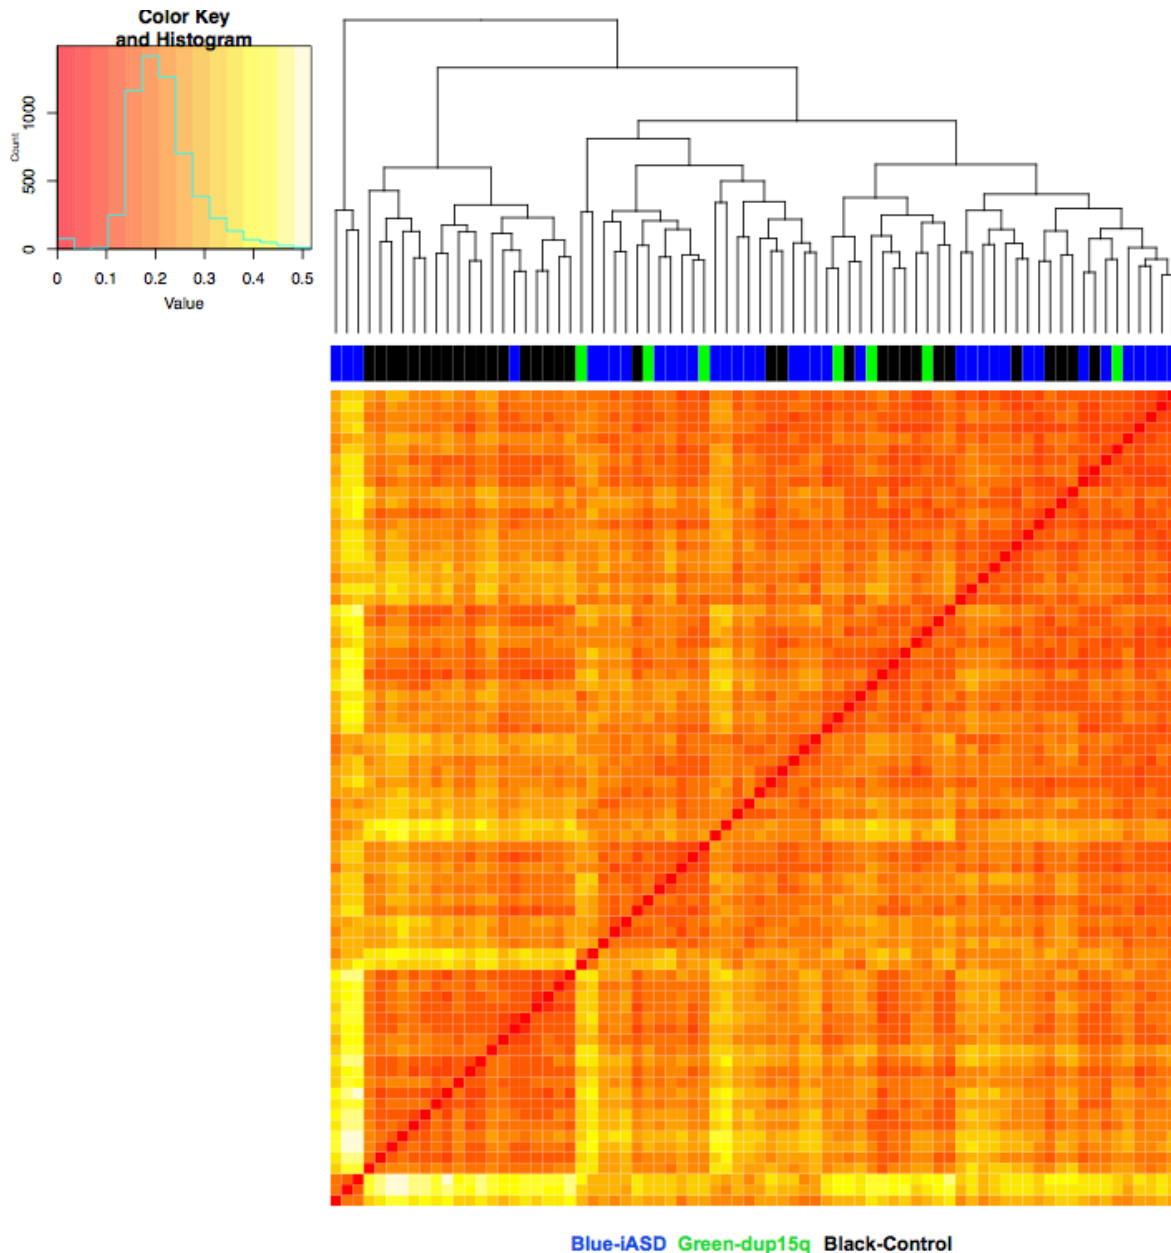

**Supplementary Figure 14: Hierarchical clustering of samples based on DNA methylation at iASD-associated DMPs in the temporal cortex (TC).** Shown is the clustering of samples based on DNA methylation levels (red = low, yellow = high) at iASD-associated DMPs ( $P < 5e-05$ ). iASD and dup15q samples are predominantly clustered together, separately to control samples.

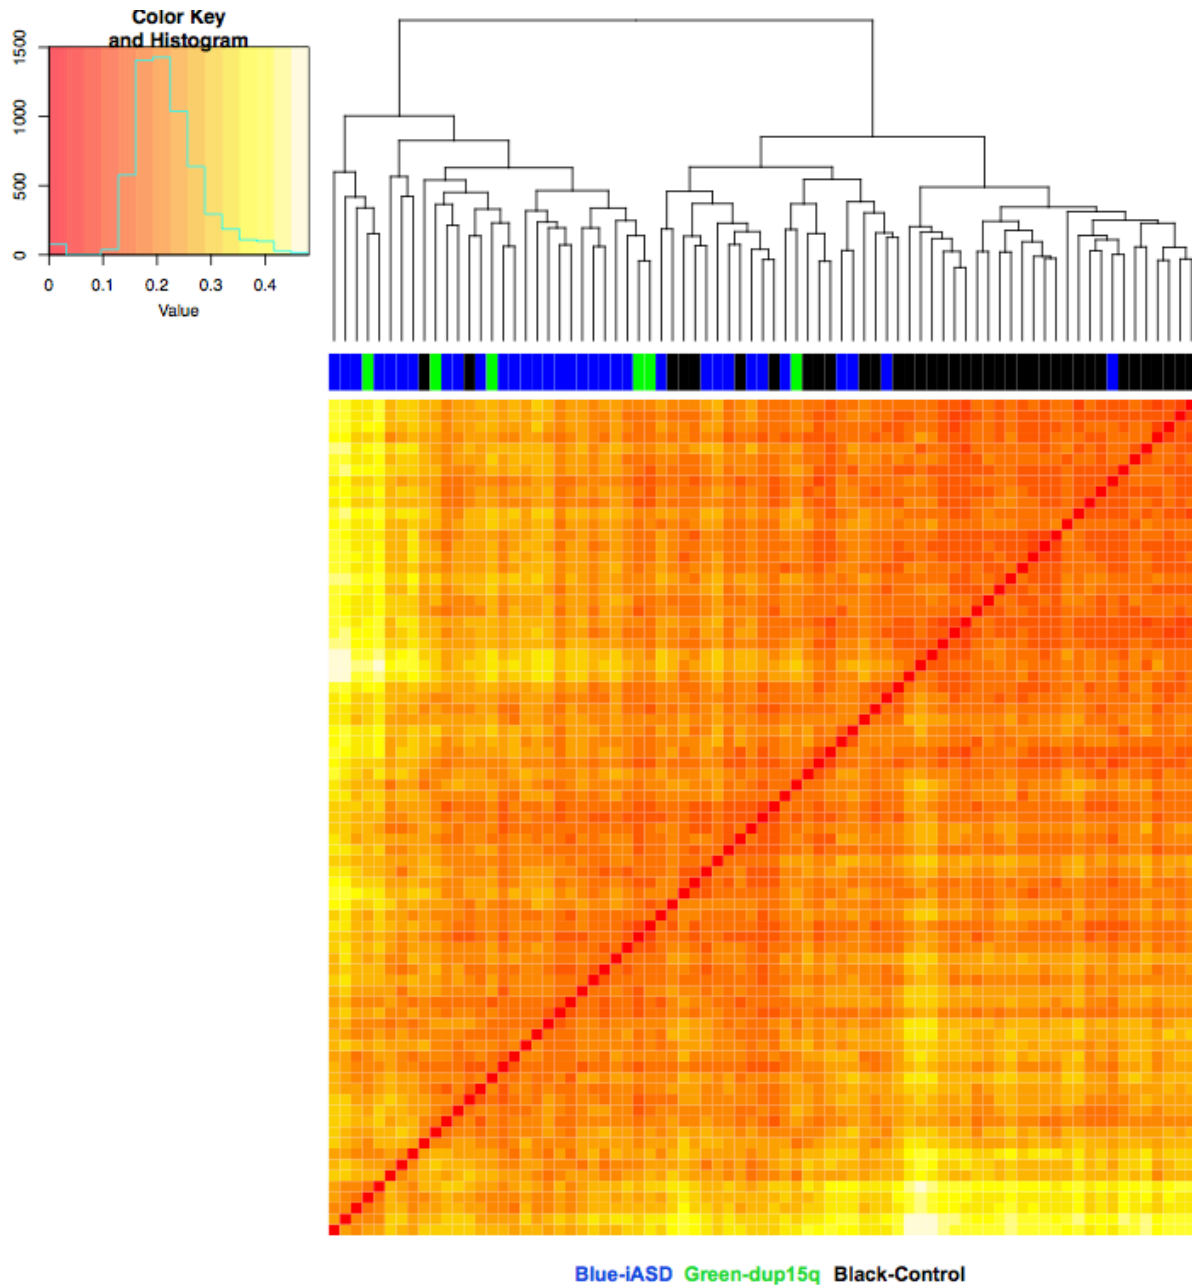

**Supplementary Figure 15: Autism-associated co-methylation modules.** Module plots displaying the top 15 hub DNA methylation sites (and their annotated genes) and top 50 connections for the eight co-methylation modules associated (FDR < 0.05) with at least one diagnostic category.

**skyblue3**

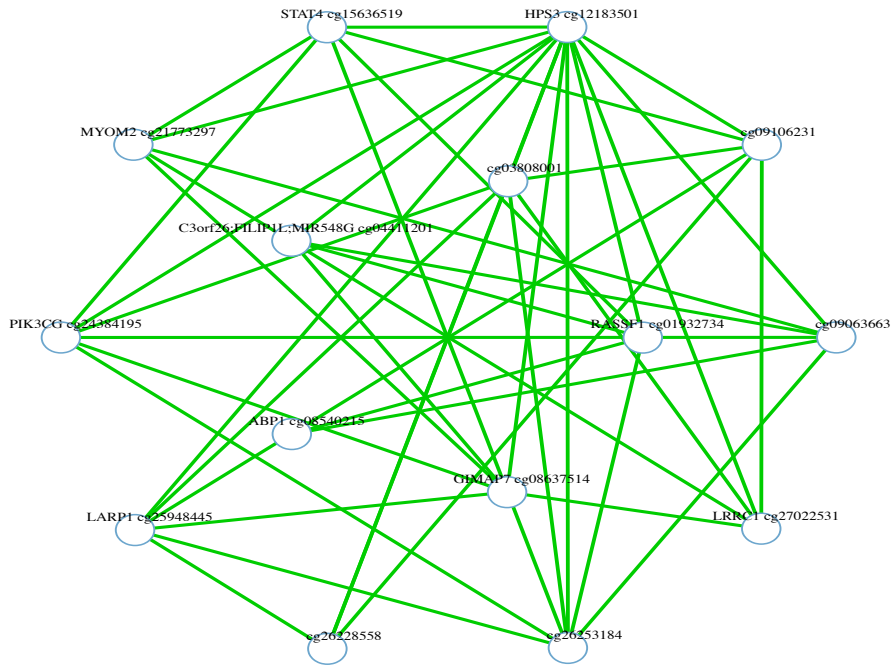

**darkorange**

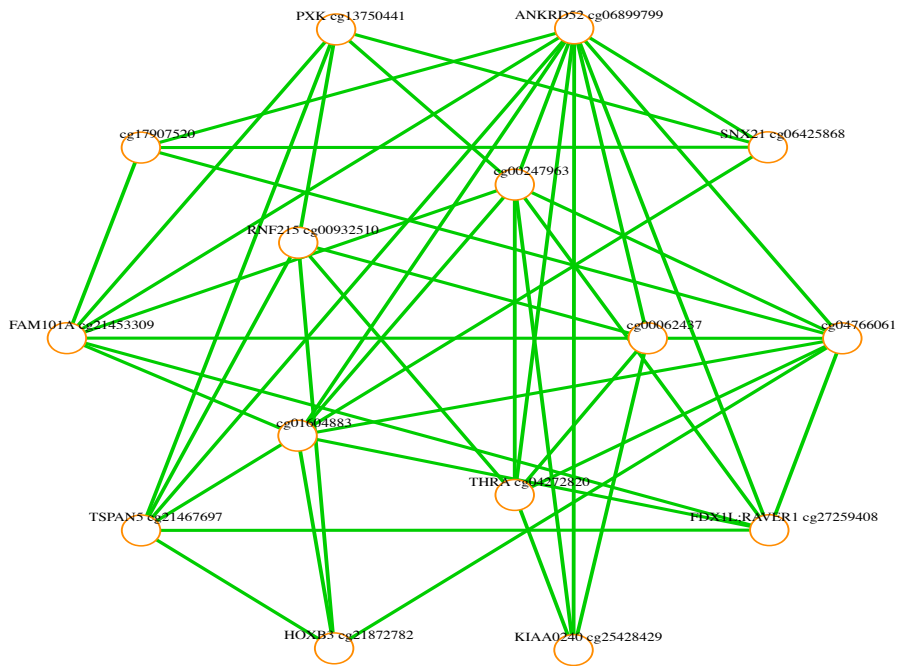



## tan

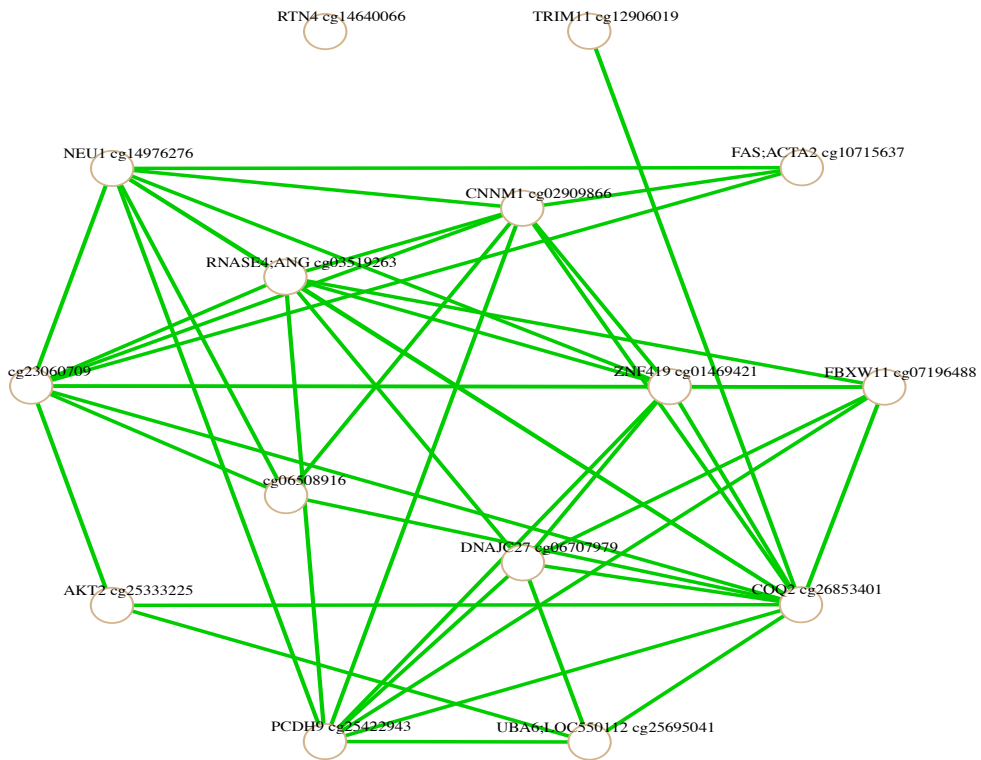

## honeydew1

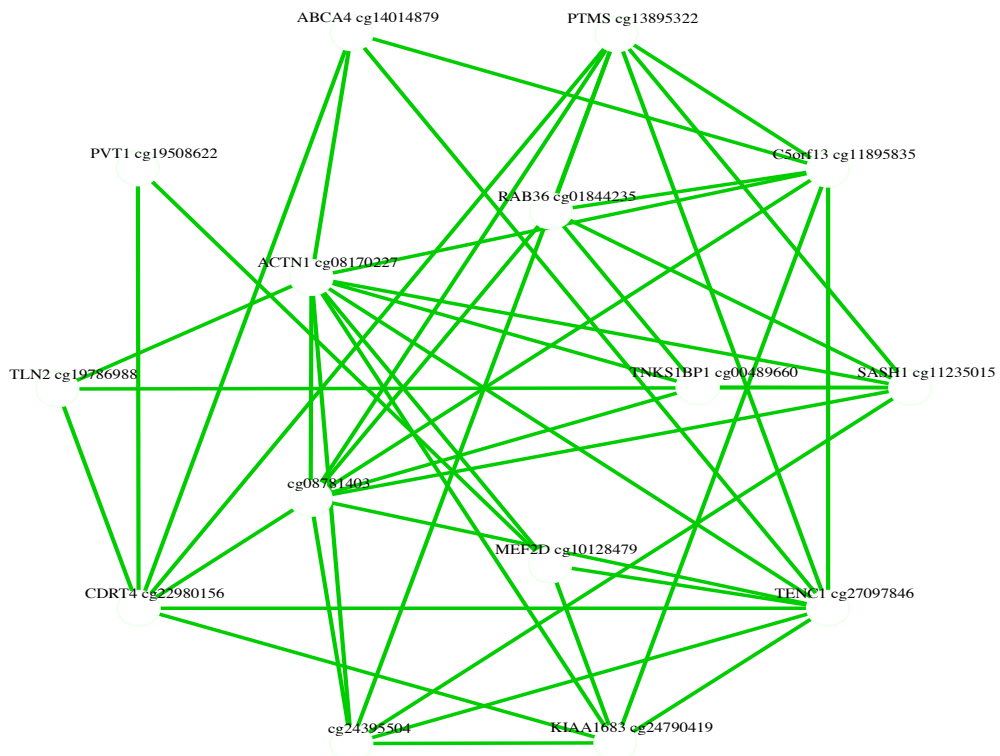

## green

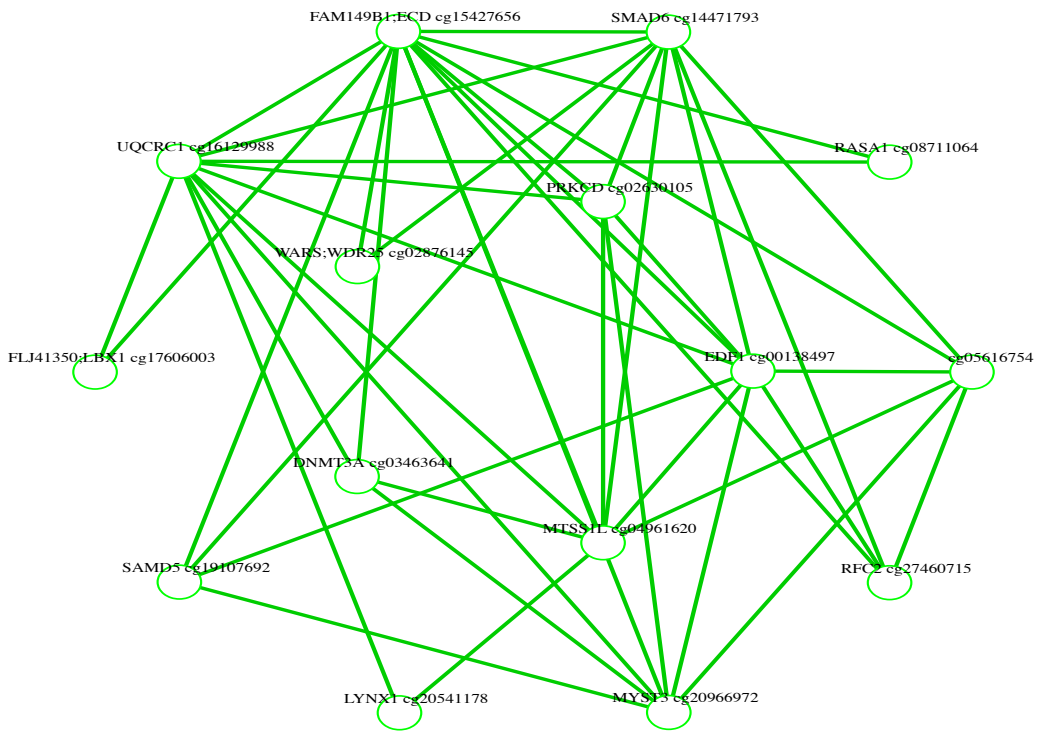

## blue

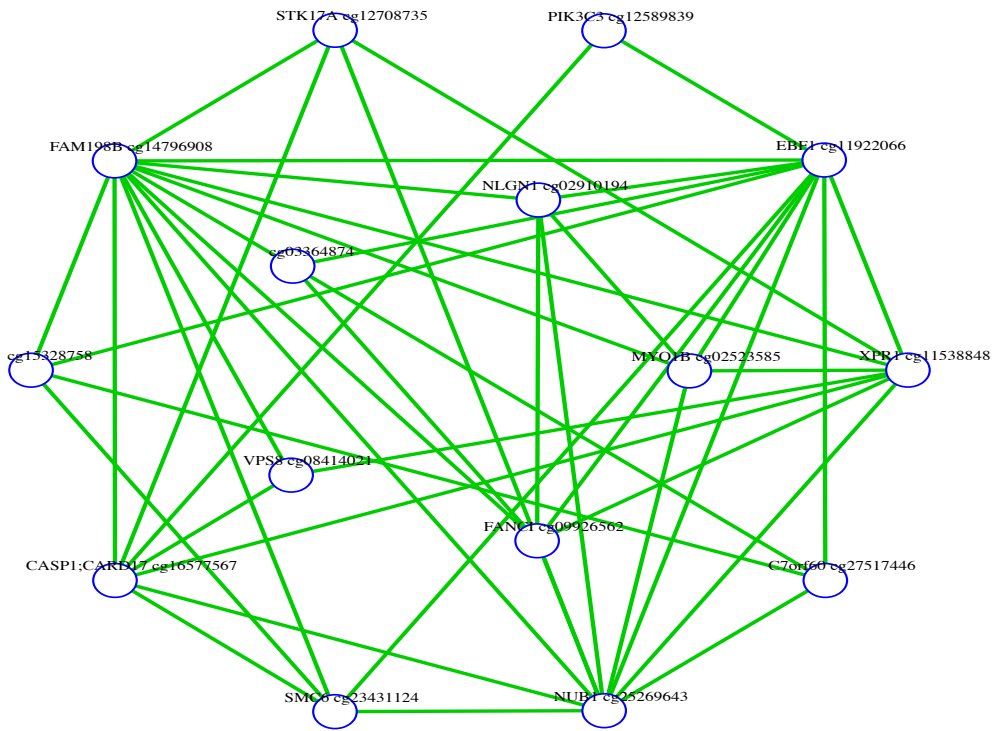

# pink

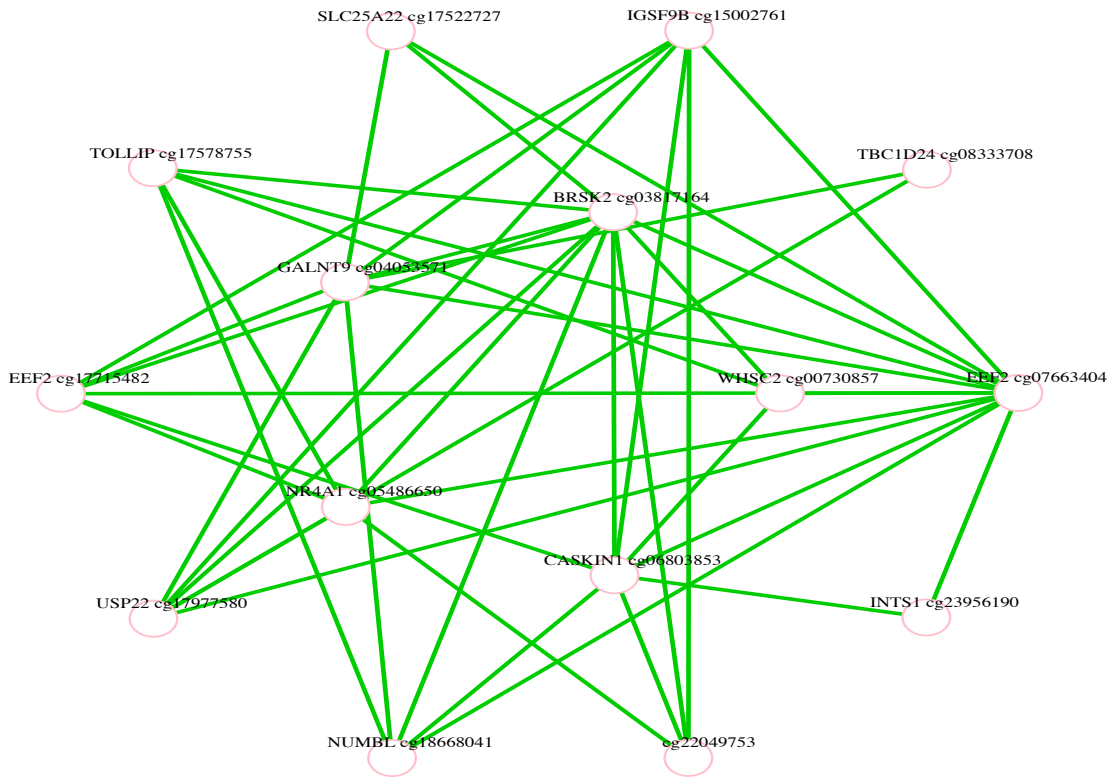

# lightsteelblue1

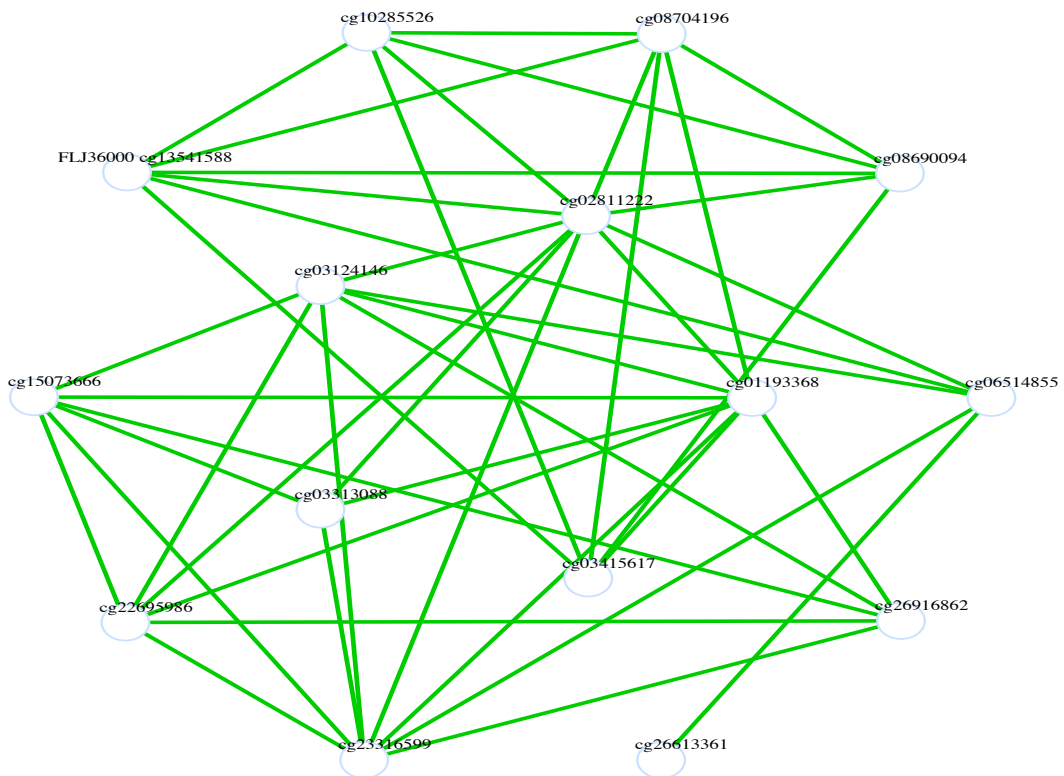

1. Horvath S. DNA methylation age of human tissues and cell types. *Genome biology* 2013; **14**(10): 3156.
2. Horvath S. Erratum to: DNA methylation age of human tissues and cell types. *Genome biology* 2015; **16**(1): 96.
